# Supplementary material for: Pasteurized Akkermansia muciniphila Reduces Fat Accumulation via nhr-49-Mediated Nuclear Hormone Signaling Pathway in Caenorhabditis elegans
Source: MDPI journal article supplement (doi:10.3390/molecules27196159), 2022-09-20
Supplement: s1 [file s1]

Supplementary Material S1: Primer sequences

Table S1. Primer sequences.

| Genes          | Forward primer sequence (5' to 3') | Reverse primer sequence (5' to 3') |
|----------------|------------------------------------|------------------------------------|
| $\beta$ -actin | GCCGGAGACGACGCTCCACGCG             | GCCTCGTCTCCGACGTACGAGTC            |
| lipl-4         | ATGGCCGAGAAGTTCCTACATCGT           | GGTGAATTGGCGACCCAATCGAAA           |
| acs-2          | GCAGCCTCGCTCTACACTCT               | GACTCCTGCAAATGCACATGC              |
| ech-1.1        | CGTCGGAGCTGGATTCAATGG              | TCGTTCAACGCTGCTGGT                 |
| fat-5          | CGGCCGCCCTCTTCCGTTAC               | TGGCTGCCATCCGACCCAGT               |
| fat-6          | TCAACAGCGCTGCTCACTAT               | TTCGACTGGGTAATTGAGG                |
| fat-7          | CAACAGCGCTGCTCACTATT               | CACCAACGGCTACAACCTGTG              |
| cpt-4          | TGACAATCGCACCTCCACAG               | TGAATGCTTCGTCCTCGTT                |
| nhr-49         | AGGCTCGTGTAATCAAGAGATGTG           | ATGCCGATGCTCCAGAATCACTTC           |
| sbp-1          | CACCACCTCATCACCACCATCAC            | TTCGTCTCTGGAGCATCTTCAATCG          |
| mdt-15         | CAGAGACTTGAGCCTGAGTTGGCC           | GTCCTTCGACATACACTTTCGAAC           |

Supplementary Material S2: IPath 3.0 visually analyze the metabolic pathways of nematodes fed with different bacteria

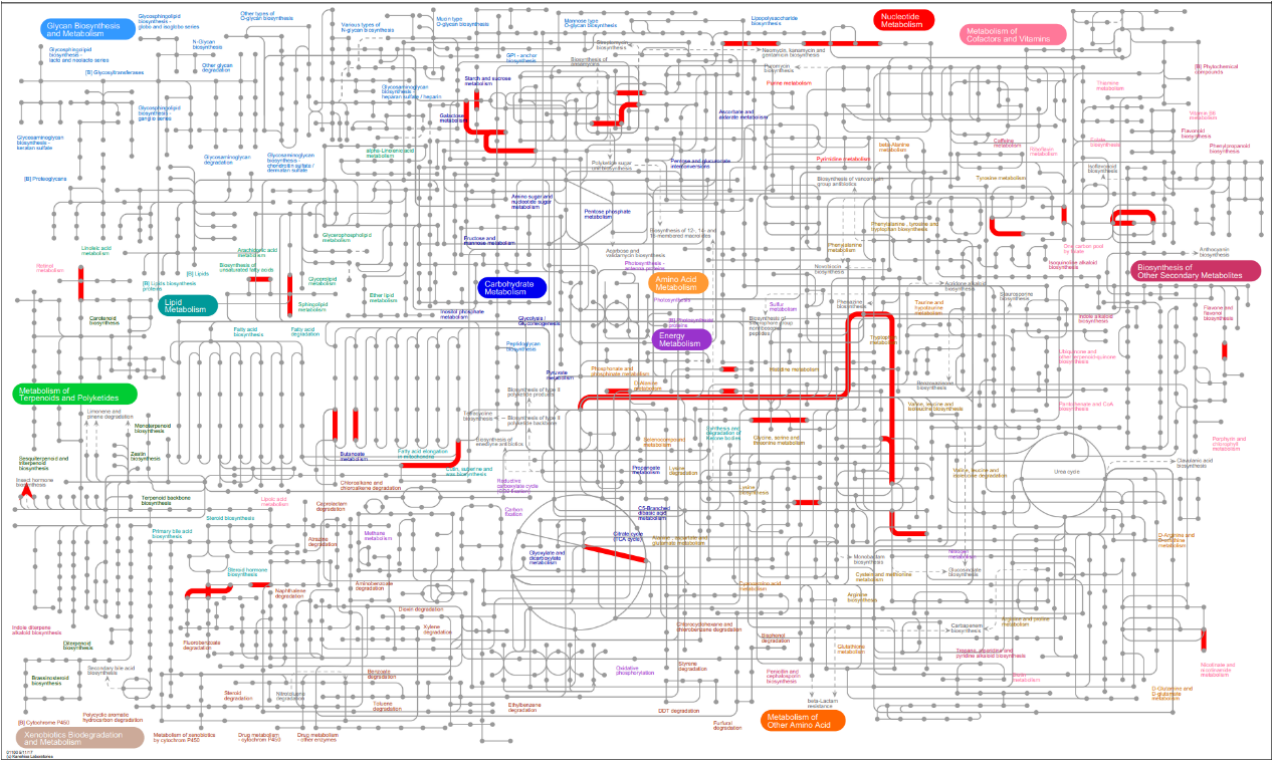

Figure S1. Analysis of RNA-seq of nematodes fed with different bacteria. IPath 3.0 software was used to visually analyze the metabolic pathways involved in these DEGs, and the metabolic information of the whole biological system was apparent. Most of the DEGs were enriched in energy metabolism.

### Supplementary Material S3: GO and KEGG analysis of DEGs between worms fed p-AKK and p-OP50

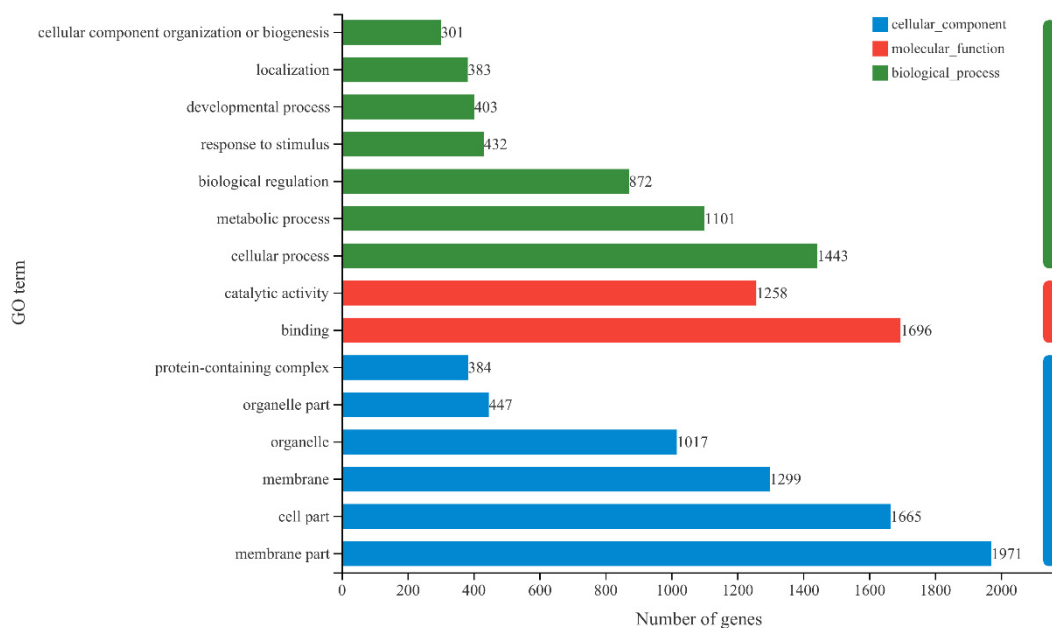

**Figure S2.** GO analysis of DEGs between worms fed p-AKK and p-OP50 in three main categories.

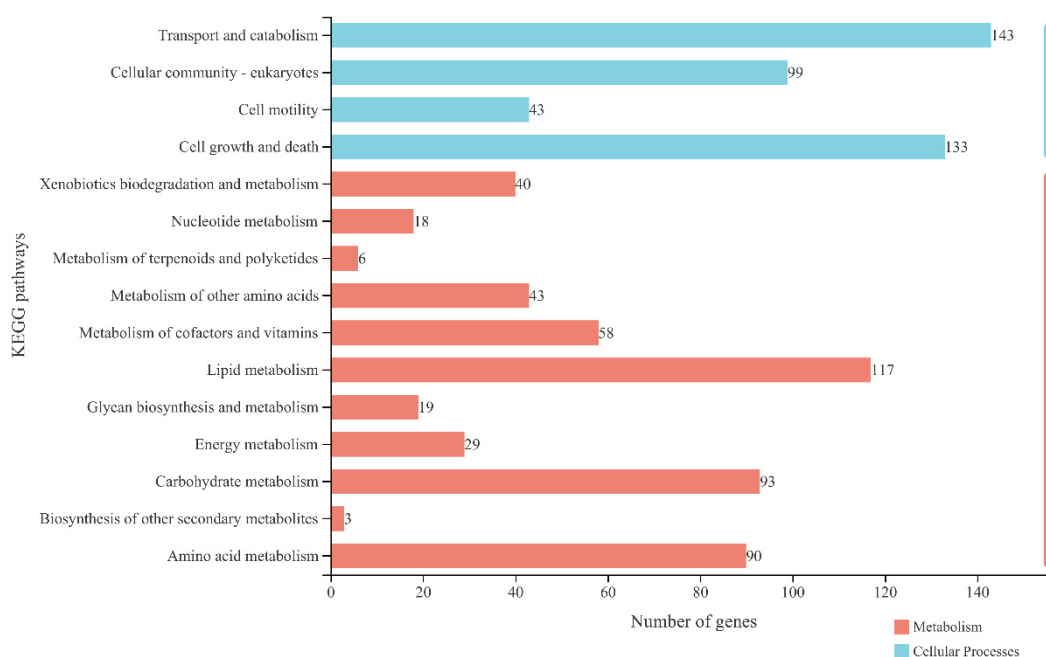

**Figure S3.** Analysis of DGEs of worms treated with p-AKK and p-OP50 by KEGG pathway classification.

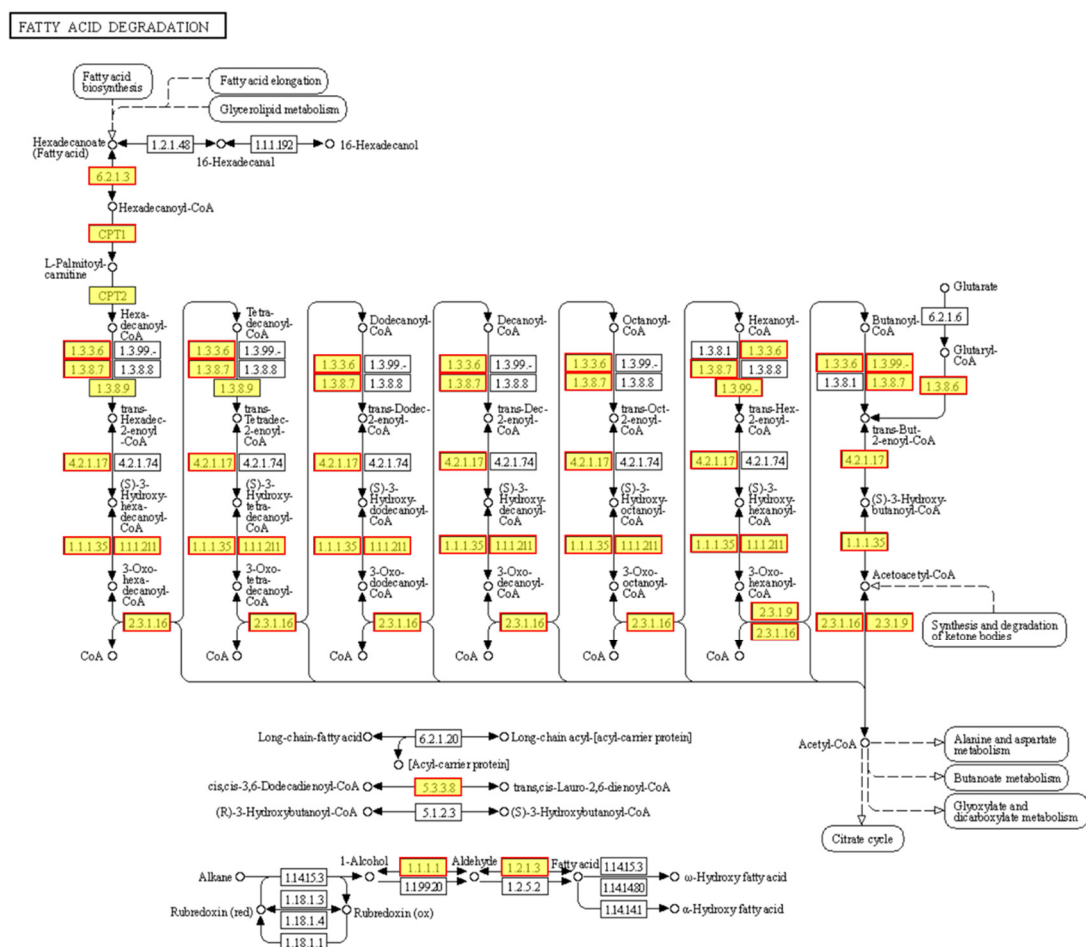

**Figure S4.** The effect of p-AKK on fatty acid degradation in KEGG pathway.

**Table S2.** The DEGs of fatty acid degradation pathway in nematodes mediated by p-AKK.

| EC Number | Gene     | Gene ID        | Description                          | Status |
|-----------|----------|----------------|--------------------------------------|--------|
| 6.2.1.3   | acs-1    | WBGene00018488 | Fatty Acid CoA Synthetase            | Down   |
|           | acs-2    | WBGene00009221 | Fatty Acid CoA Synthetase            | Up     |
|           | acs-23   | WBGene00011174 | Fatty Acid CoA Synthetase            | Up     |
|           | acs-15   | WBGene00019920 | Fatty Acid CoA Synthetase            | Up     |
|           | acs-16   | WBGene00018579 | Fatty Acid CoA Synthetase            | Up     |
|           | acs-18   | WBGene00011173 | Fatty Acid CoA Synthetase            | Up     |
| CPT 1     | cpt-4    | WBGene00019644 | Carnitine Palmitoyl Transferase      | Up     |
| 1.3.3.6   | acox-1.2 | WBGene00008565 | Acyl-coenzyme A oxidase              | Down   |
|           | acox-3   | WBGene00019060 | Acyl-coenzyme A oxidase              | Up     |
|           | acox-1.6 | WBGene00010336 | Acyl-coenzyme A oxidase              | Up     |
| 1.3.8.7   | acdh-8   | WBGene00019406 | Acyl CoA DeHydrogenase               | Up     |
| 4.2.1.17  | ech-6    | WBGene00001155 | Enoyl-CoA Hydratase                  | Down   |
|           | ech-7    | WBGene00001156 | Enoyl-CoA Hydratase                  | Down   |
| 1.1.1.35  | ech-9    | WBGene00001158 | Enoyl-CoA Hydratase                  | Down   |
| 1.1.1.211 | ech-1.1  | WBGene00001150 | Enoyl-CoA Hydratase                  | Down   |
| 2.3.1.16  | acaa-2   | WBGene00009952 | ACetyl-CoA Acyltransferase 2 homolog | Down   |
| 1.3.99.-  | acdh-1   | WBGene00016943 | Acyl CoA DeHydrogenase               | Down   |
|           | acdh-2   | WBGene00015894 | Acyl CoA DeHydrogenase               | Down   |
|           | acdh-4   | WBGene00020419 | Acyl CoA DeHydrogenase               | Up     |
| 2.3.1.9   | kat-1    | WBGene00002183 | Acetyl-CoA acetyltransferase homolog | Down   |
| 1.3.8.6   | F54D5.24 | WBGene00271798 | Unclassified                         | Up     |
| 1.1.1.1   | sodh-1   | WBGene00010790 | Alcohol dehydrogenase 1              | Up     |
| 1.2.1.3   | alh-5    | WBGene00000107 | ALdehyde deHydrogenase               | Up     |

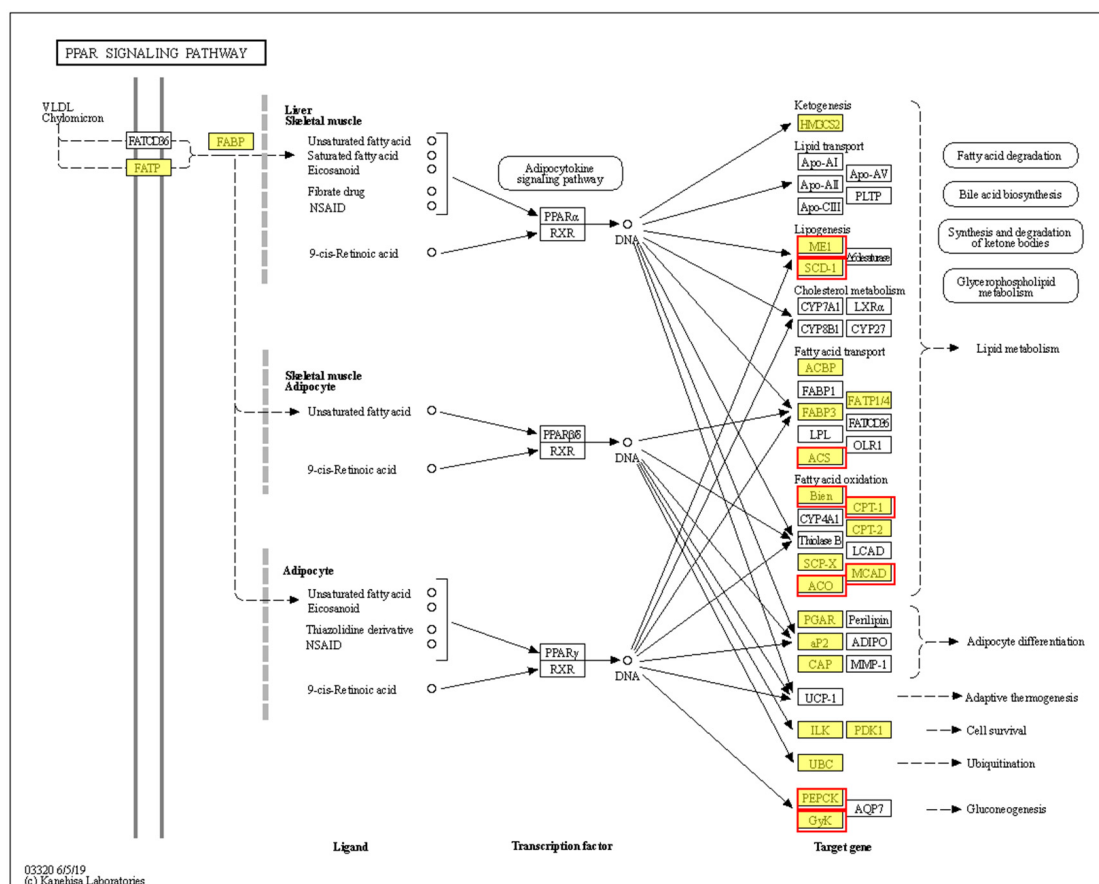

**Figure S5.** The effect of p-AKK on fat metabolism in PPAR pathway.

**Table S3.** The DEGs of PPAR pathway in nematodes mediated by p-AKK.

|       | Gene     | Gene ID        | Description                             | Function             | Status |
|-------|----------|----------------|-----------------------------------------|----------------------|--------|
| ME1   | men-1    | WBGene00012983 | Malic enzyme                            | Lipogenesis          | Down   |
| SCD-1 | fat-7    | WBGene00001399 | Delta(9)-fatty-acid desaturase          | Lipogenesis          | Down   |
| ACS   | acs-2    | WBGene00009221 | Fatty Acid CoA Synthetase               | Fatty acid transport | Up     |
|       | acs-18   | WBGene00011173 | Fatty Acid CoA Synthetase               | Fatty acid transport | Up     |
|       | acs-15   | WBGene00019920 | Fatty Acid CoA Synthetase               | Fatty acid transport | Up     |
|       | acs-16   | WBGene00019920 | Fatty Acid CoA Synthetase               | Fatty acid transport | Up     |
| Bien  | ech-9    | WBGene00001158 | Enoyl-CoA Hydratase                     | Fatty acid oxidative | Down   |
| CPT-1 | cpt-4    | WBGene00019644 | Carnitine Palmitoyl Transferase         | Fatty acid oxidative | Up     |
| MCAD  | acdh-8   | WBGene00019406 | Acyl CoA DeHydrogenase                  | Fatty acid oxidative | Up     |
| ACO   | acox-3   | WBGene00019060 | Acyl-coenzyme A oxidase                 | Fatty acid oxidative | Up     |
|       | acox-1.5 | WBGene00008167 | peroxisomal acyl-coenzyme A oxidase 1.5 | Fatty acid oxidative | Down   |
|       | acox-1.6 | WBGene00010336 | Acyl-coenzyme A oxidase                 | Fatty acid oxidative | Up     |
| PEPCK | pck-3    | WBGene00019151 | Phosphoenolpyruvate Carboxy Kinase      | Gluconeogenesis      | Up     |
| GYK   | R11F4.1  | WBGene00020007 | glycerol kinase                         | Gluconeogenesis      | Up     |

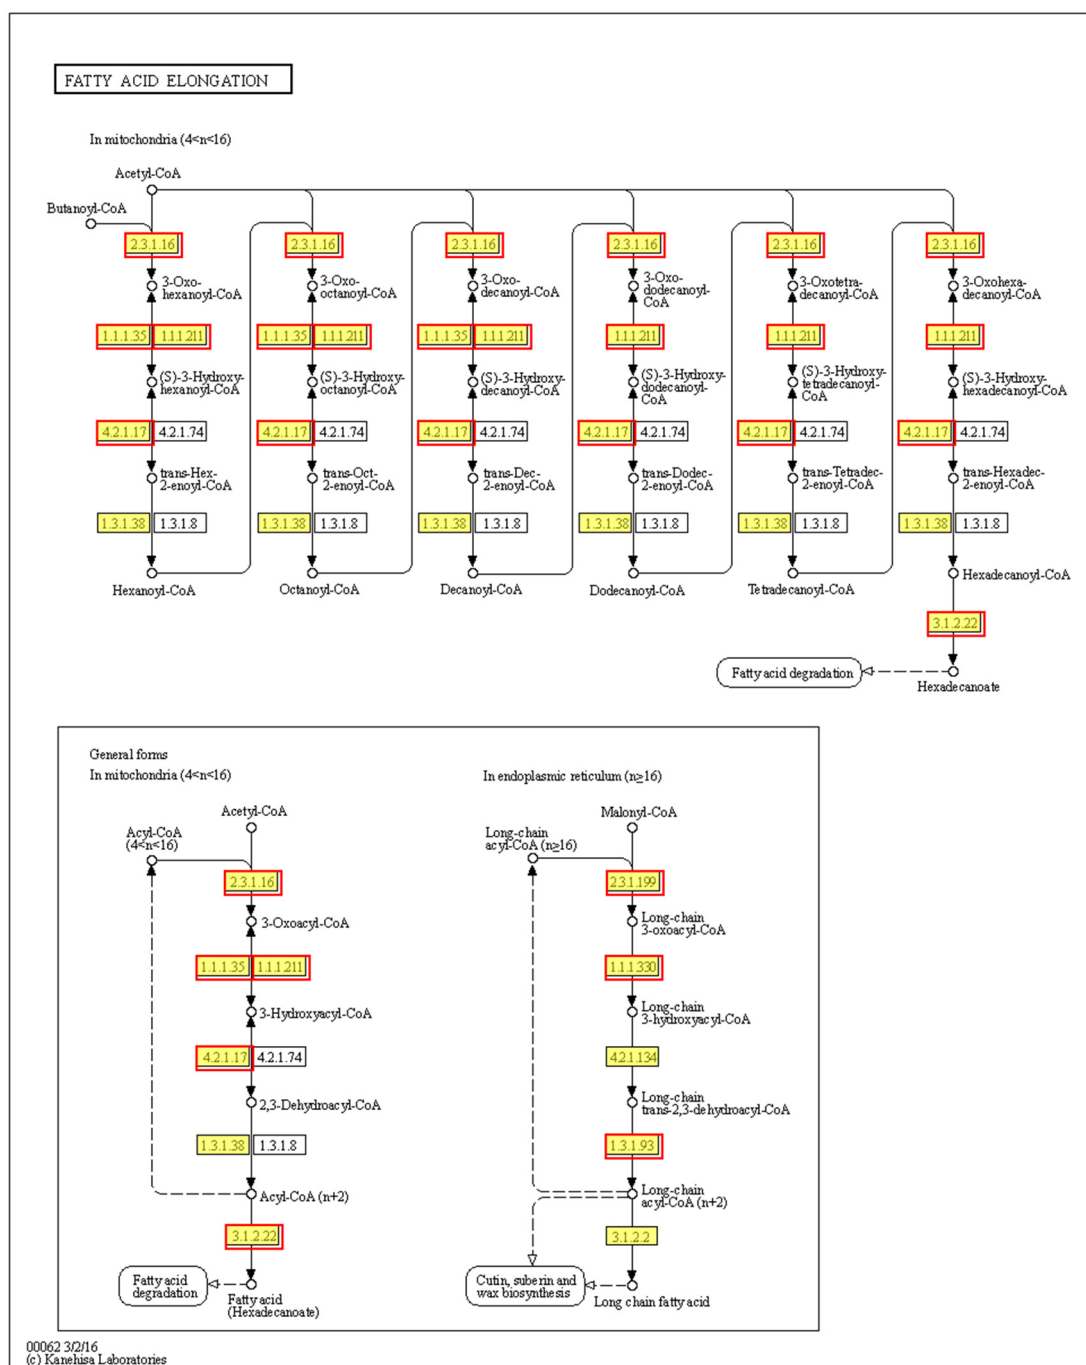

**Figure S6.** The effect of p-AKK on fatty acid prolongation in KEGG pathway.

**Table S4.** The DEGs of fatty acid prolongation pathway in nematodes mediated by p-AKK.

| EC Number | Gene    | Gene ID        | Description                                         | Status |
|-----------|---------|----------------|-----------------------------------------------------|--------|
| 2.3.1.16  | acaa-2  | WBGene00009952 | ACetyl-CoA Acyltransferase 2                        | Down   |
| 1.1.1.35  | ech-9   | WBGene00001158 | Enoyl-CoA Hydratase                                 | Down   |
| 1.1.1.211 | ech-1.1 | WBGene00001150 | Enoyl-CoA Hydratase                                 | Down   |
| 4.2.1.17  | ech-7   | WBGene00001156 | Enoyl-CoA Hydratase                                 | Down   |
|           | ech-6   | WBGene00001155 | Enoyl-CoA Hydratase                                 | Down   |
| 3.1.1.22  | ppt-1   | WBGene00004092 | Palmitoyl-protein thioesterase 1                    | Up     |
| 23.1.199  | elo-5   | WBGene00001243 | Elongation of very long chain fatty acids protein 5 | Down   |
|           | elo-9   | WBGene00001247 | Elongation of very long chain fatty acids protein   | Down   |
|           | elo-8   | WBGene00001246 | Elongation of very long chain fatty acids protein   | Up     |
|           | elo-3   | WBGene00001241 | Putative fatty acid elongation protein 3            | Down   |
|           | elo-2   | WBGene00001240 | Elongation of very long chain fatty acids protein   | Down   |
|           | elo-7   | WBGene00001245 | Elongation of very long chain fatty acids protein   | Up     |
| 1.1.1.330 | rpn-13  | WBGene00016981 | Proteasomal ubiquitin receptor                      | Down   |
|           | dhs-27  | WBGene00000990 | oxidoreductase                                      | Up     |
| 1.3.1.93  | art-1   | WBGene00000198 | very-long-chain enoyl-CoA reductase                 | Down   |

**Supplementary Material S5: DEGs and mRNA levels in fat metabolism of worms treated with p-AKK and p-OP50**

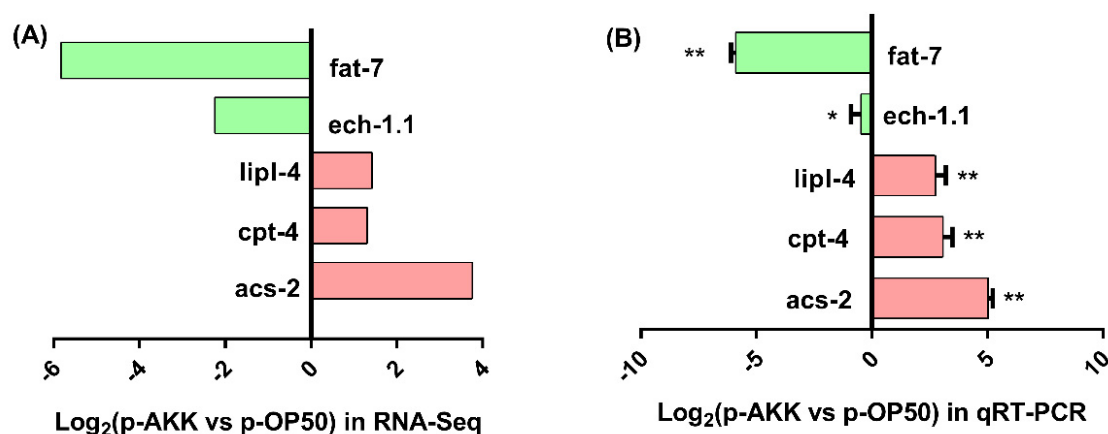

**Figure S7.** DEGs and mRNA levels in fat metabolism of worms treated with p-AKK and p-OP50 in RNA-Seq (A) and qRT-PCR (B).
